# Supplementary material
Source: PubMed Central journal article supplement (PMC4201328)
Supplement: ol502242a_si_001.pdf [file ol502242a_si_001.pdf]

# Supporting Information

## Molecular Genetic Characterization of Terreic Acid Pathway in *Aspergillus terreus*

Chun-Jun Guo,<sup>a</sup> Wei-Wen Sun,<sup>a</sup> Kenneth S. Bruno, Clay C. C. Wang

Correspondence should be addressed to C.C.C.W. (clayw@usc.edu).

<sup>a</sup> Equally contributed to the project.

### Table of Contents

|                                                                                                  |         |
|--------------------------------------------------------------------------------------------------|---------|
| <b>Supplemental Methods</b>                                                                      | S2      |
| <b>Spectral data of compounds</b>                                                                | S3      |
| <b>Supplemental references</b>                                                                   | S3      |
| <b>Table S1.</b> Primers used in this study                                                      | S4      |
| <b>Table S2.</b> <i>A. terreus</i> strains used in this study                                    | S6      |
| <b>Table S3.</b> <sup>1</sup> H and <sup>13</sup> C NMR data for compound <b>1</b>               | S7      |
| <b>Table S4.</b> <sup>1</sup> H and <sup>13</sup> C NMR data for compound <b>2</b>               | S7      |
| <b>Table S5.</b> <sup>1</sup> H and <sup>13</sup> C NMR data for compound <b>3</b>               | S8      |
| <b>Table S6.</b> <sup>1</sup> H and <sup>13</sup> C NMR data for compound <b>4</b>               | S8      |
| <b>Table S7.</b> AtX (ATEG_06275.1) homologs with identity over 40%                              | S9      |
| <b>Figure S1.</b> UV-Vis and ESIMS spectra of <b>1</b> to <b>4</b> and compound labeled with “*” | S11     |
| <b>Figure S2.</b> Schematic of the diagnostic PCR strategy                                       | S12     |
| <b>Figure S3.</b> Results of diagnostic PCR for all the gene deletion strains                    | S13     |
| <b>Figure S4.</b> The result of feeding compound <b>5</b> to <i>atXΔ</i>                         | S14     |
| <b>Figure S5-S8.</b> NMR spectra of compounds <b>1</b> to <b>4</b>                               | S15-S20 |

## Supplemental methods

### Strains and molecular manipulations

Primers used in this study are listed in Table S1. *A. terreus* strains used in this study are listed in Table S2. All targeted genes were individually replaced by the *A. fumigatus pyrG* gene (*AfpyrG*) in the *A. terreus kusA*-, *pyrG*- strain. The construction of double joint fusion PCR products, protoplast generation, and transformation were carried out according to previous procedures.<sup>1</sup> Diagnostic PCR of the mutant strains was carried out by using the external primers from the first round of fusion PCR. The difference in size between the gene replaced by the resistant marker and the native gene allowed us to determine if the transformants carried correct gene replacement. When the targeted gene size was similar to the marker *AfpyrG*, an internal primer that specifically binds to *AfpyrG* was used with an outside primer. When the targeted gene was successfully replaced by *AfpyrG*, a PCR fragment of around 4 kb could be amplified from the mutant strains (Figure S2 and S3).

### Fermentation and LC-MS analysis

*A. terreus* NIH 2624 was cultivated at 30 °C on YAG plates at  $10 \times 10^6$  spores per plate (D = 10 cm). After 6 days, agar was chopped into small pieces and extracted by 80 ml 1:1 CH<sub>2</sub>Cl<sub>2</sub>/MeOH. The extract was evaporated *in vacuo* to yield a water residue, which was suspended in 25 ml H<sub>2</sub>O and partitioned with ethyl acetate (EtOAc, 25 ml  $\times$  2). The EtOAc layer was discarded. The pH of the water layer was then adjusted to around 2 by 6M HCl and partitioned with 25ml EtOAc. The EtOAc layer was evaporated *in vacuo*, re-dissolved in 1 ml of 20% DMSO in MeOH and a portion (10 $\mu$ l) was examined by high performance liquid chromatography–photodiode array detection–mass spectrometry (HPLC–DAD–MS) analysis. HPLC–MS was carried out using a ThermoFinnigan LCQ Advantage ion trap mass spectrometer with an RP C18 column (Alltech Prevail C18 3 mm 2.1  $\times$  100 mm) at a flow rate of 125  $\mu$ l/min. The condition for MS analysis was carried out as previously described.<sup>1</sup>

### Isolation of secondary metabolites

For scale up, *A. terreus* wild type and knock-outs were cultivated at 30 °C on YAG plates (D = 15 cm, ~50 ml per plate, total volume = 2 liter) for 6 days. Agar was chopped into small pieces and then soaked in 2 L of 1:1 CH<sub>2</sub>Cl<sub>2</sub>/MeOH for 24 hrs. After filtration, the crude extract was evaporated *in vacuo* to yield a residue, which was then suspended in 500 ml water and partitioned with EtOAc (500 ml) three times. The EtOAc layer was discarded. The pH of the water layer was then adjusted to around 2 and extracted with EtOAc (500 ml  $\times$  2). The combined EtOAc layer was evaporated *in vacuo* to a crude extract.

Further purification was carried on by gradient HPLC on a C18 reverse phase column [Phenomenex Luna 5 $\mu$ m C18, 250  $\times$  10 mm] with a flow rate of 5.0 ml/min and measured by a UV detector at 254 nm. The gradient system was MeCN (solvent B)

and 5% MeCN/H<sub>2</sub>O (solvent A) both containing 0.05% TFA.

The gradient condition for HPLC analysis of crude extract from WT was 0-2 min 100-80% A, 2-7 min 80-66% A, 7-27 min 66-54.8% A, 27-29 min 54.8-0% A, 29-31 min 0-100% A, 31-33 min 100% A. Compound **1** (28 mg/L) was eluted at about 5 min. The gradient condition for HPLC analysis of crude extracts from ATEG\_06272.1Δ and ATEG\_06274.1Δ was 0-5 min 100-80% A, 5-20 min 80-60% A, 20-25 min 60-0% A, 25-30 min 0-100% A, 30-35 min 100% A. Compounds **2** (16 mg/L) and **3** (5 mg/L) were eluted at 16.0 min and 6.5 min, respectively. The gradient condition for HPLC analysis of crude extract from ATEG\_06277.1Δ was 0-5 min 100-80% A, 5-10 min 80% A, 10-12 min 80-0% A, 12-14 min 0% A, 14-16 min 0-100% A, 16-18 min 100% A. Compound **4** (7.5 mg/L) was eluted at 9.0 min.

### Feeding compound **5** to *atXΔ*

The 3-methylcatechol (**5**) was bought from Sigma Aldrich. It was dissolved in DMSO and added to YAG medium when the medium's temperature dropped to around 50 °C after autoclaving. The *atXΔ* mutant was cultivated at 30 °C on YAG containing 0.2 mg/ml compound **5**. The WT strain and the *atXΔ* mutant were also cultivated on ordinary YAG as control. After 6 days cultivation, the followed extraction and LC-MS analysis were similar as described above.

### Spectral data of compounds

HRESIMS spectra were obtained on an Agilent Technologies 1200 series high-resolution mass spectrometer. NMR spectra were collected on a Varian Mercury Plus 400 spectrometer.

**Terreic acid (1), 6-methylsalicylic acid (2), terremutin (3) and (2E, 4Z)-2-methyl-2, 4-hexadienedioic acid (4).** For UV-Vis and ESIMS spectra, see Figure S1; For NMR spectra, see Table S3, S4, S5 and S6 respectively. The molecular formula of compound **4** was determined by HRESIMS to be C<sub>7</sub>H<sub>7</sub>O<sub>4</sub> [M - H]<sup>-</sup> (*m/z* 155.0341, calcd for C<sub>7</sub>H<sub>7</sub>O<sub>4</sub> 155.0350). The NMR data of compounds **1, 2, 3** were in good agreement with the published data.<sup>2,3,4</sup>

### Supplemental references

1. Guo, C.-J.; Knox, B. P.; Chiang, Y.-M.; Lo, H.-C.; Sanchez, J. F.; Lee, K.-H.; Oakley, B. R.; Bruno, K. S.; Wang, C. C. C. *Org. Lett.* **2012**, *14*, 5684.
2. Findlay, J. A.; Radics, L. *J. Chem. Soc., Perkin Trans. 1* **1972**, 2071.
3. Fujii, I.; Ono, Y.; Tada, H.; Gomi, K.; Ebizuka, Y.; Sankawa, U. *Mol. Gen. Genet.* **1996**, *253*, 1.
4. Dewi, R. T.; Tachibana, S.; Itoh, K. *J. of Microb. Biochem. Technol.* **2012**, *04*, 10.

**Table S1.** Primers used in this study

| primer         | Sequence (5'→3')                                          |
|----------------|-----------------------------------------------------------|
| ATEG_06270.1P1 | GGC GAT TGG TCT TTA ATC TG                                |
| ATEG_06270.1P2 | AGA CAT GGC GTC TAT CTC GT                                |
| ATEG_06270.1P3 | CGA AGA GGG TGA AGA GCA TTG GGA TCA CAG TAT TCG CCA GT    |
| ATEG_06270.1P4 | CAT CAG TGC CTC CTC TCA GAC AGA CAA CAA CCA TCA GGT CGT G |
| ATEG_06270.1P5 | GAT TCG ACG GTG AAG AAC TC                                |
| ATEG_06270.1P6 | GCC TCT ATG GTC GAA CAA TC                                |
| ATEG_06271.1P1 | CCA CCA CAG TGT GAA ACC TA                                |
| ATEG_06271.1P2 | CAA ATG CAA GAC TCC TGT GA                                |
| ATEG_06271.1P3 | CGA AGA GGG TGA AGA GCA TTG GGG TTG TTA TCA CTG CTG CT    |
| ATEG_06271.1P4 | CAT CAG TGC CTC CTC TCA GAC AGG CTA TGG CAG ACT ACA GAA C |
| ATEG_06271.1P5 | GTC ATG ACC TAT CCC ATT GA                                |
| ATEG_06271.1P6 | CCT TAT ACC GAT GGA TGT CG                                |
| ATEG_06272.1P1 | CCA GAG TTA CGA CGA TTT C                                 |
| ATEG_06272.1P2 | GTC CTT CTC AAC CTG TGT AT                                |
| ATEG_06272.1P3 | CGA AGA GGG TGA AGA GCA TTG TAG GTC ACA CAC AAG ACA CT    |
| ATEG_06272.1P4 | CAT CAG TGC CTC CTC TCA GAC AGC CAT AAA GCT TCC AGA AGA G |
| ATEG_06272.1P5 | GGG ACA CTA CAC GAC TGT AT                                |
| ATEG_06272.1P6 | GTA TGT CAC AGG GAA CAA TG                                |
| ATEG_06273.1P1 | GGT CTC ATT CTC GAC TTT GC                                |
| ATEG_06273.1P2 | ATT CTC GAC TTT GCT GAG GA                                |
| ATEG_06273.1P3 | CGA AGA GGG TGA AGA GCA TTG ACA ATG ATA TCG CGA TCC TG    |
| ATEG_06273.1P4 | CAT CAG TGC CTC CTC TCA GAC AGC GTT ACG ACG CTC AAG TTA G |
| ATEG_06273.1P5 | GGT ACC AAA CAG CTT CGT CT                                |
| ATEG_06273.1P6 | CCG AAA GAG GTA CCA AAC AG                                |
| ATEG_06274.1P1 | TGT ACC TCA TTC GTC CCA TT                                |
| ATEG_06274.1P2 | CCA TTC CAA TAG GGT TGC TA                                |
| ATEG_06274.1P3 | CGA AGA GGG TGA AGA GCA TTG TCC CAG TAT GGA GAA CTC GT    |
| ATEG_06274.1P4 | CAT CAG TGC CTC CTC TCA GAC AGA ACT TAT GGG GCT TTC TGA   |
| ATEG_06274.1P5 | ACA TCT GGT GGG ATG GTT T                                 |
| ATEG_06274.1P6 | ACC CAC ACT GAC CTG GAG TT                                |
| ATEG_06275.1P1 | CGC CTA TCT CTC CCC TTA GT                                |
| ATEG_06275.1P2 | CGG ATG TCT AAA AGG AGC AG                                |
| ATEG_06275.1P3 | CGA AGA GGG TGA AGA GCA TTG ATG CCT GAA GAG GAG AGA TG    |
| ATEG_06275.1P4 | CAT CAG TGC CTC CTC TCA GAC AGG CTG ACG GTT TCT CCT TAT G |
| ATEG_06275.1P5 | TTT CTG AGG TGA TGG GCT AC                                |
| ATEG_06275.1P6 | CTG TTC GAT GAG TGT GGC TA                                |
| ATEG_06276.1P1 | ATG CCT GAA GAG GAG AGA TG                                |
| ATEG_06276.1P2 | GCG TCG CCT CTA CAT CTT AT                                |
| ATEG_06276.1P3 | CGA AGA GGG TGA AGA GCA TTG AGG ATG GCC TAA GCA CGT A     |
| ATEG_06276.1P4 | CAT CAG TGC CTC CTC TCA GAC AGC CAA ATG GAT TGA GTG TGT G |
| ATEG_06276.1P5 | GAA GTG GCT ATC AGC TTT CG                                |
| ATEG_06276.1P6 | GTG CCT TGC ATA CAG GAA GT                                |

|                                         |                                                            |
|-----------------------------------------|------------------------------------------------------------|
| ATEG_06277.1P1                          | CCA AAT GGA TTG AGT GTG TG                                 |
| ATEG_06277.1P2                          | GTG TGT GTA TGC CTT CGA GA                                 |
| ATEG_06277.1P3                          | CGA AGA GGG TGA AGA GCA TTG GTG CCT TGC ATA CAG GAA GT     |
| ATEG_06277.1P4                          | CAT CAG TGC CTC CTC TCA GAC AGG AGT TGG GTG GAA GAT TGA G  |
| ATEG_06277.1P5                          | GTC CTC CTG GAA CTG CTC TA                                 |
| ATEG_06277.1P6                          | AGG AAA CGT CAG TCC CTT CT                                 |
| ATEG_06278.1P1                          | AGA GTC ACC ACA AGC GAC AT                                 |
| ATEG_06278.1P2                          | CCG ATT GGT TAA GAA TGG AC                                 |
| ATEG_06278.1P3                          | CGA AGA GGG TGA AGA GCA TTG GGC TGG TTG AAC AAT AGC AG     |
| ATEG_06278.1P4                          | CAT CAG TGC CTC CTC TCA GAC AGG TCG TTC TTA TCG CAA CCA T  |
| ATEG_06278.1P5                          | CAT CTC CCG AAG CAC TCT AC                                 |
| ATEG_06278.1P6                          | GCA AGC TGC CTT ACA TCA AT                                 |
| ATEG_06279.1P1                          | TCT GCG TCA GCT ATG GT CTA                                 |
| ATEG_06279.1P2                          | ATC CCT GGA AAA CTG TTG G                                  |
| ATEG_06279.1P3                          | CGA AGA GGG TGA AGA GCA TTG GCA GTC AAT GAG TTG CAA TG     |
| ATEG_06279.1P4                          | CAT CAG TGC CTC CTC TCA GAC AGA CGG CTG AAT TAG TTC GTG T  |
| ATEG_06279.1P5                          | GAC TAG TGA TCG GCA GGA TG                                 |
| ATEG_06279.1P6                          | AAG CCG AGG TAA TGA TGC T                                  |
| ATEG_06280.1P1                          | TAT CGG CAA AGA CAA GAT CG                                 |
| ATEG_06280.1P2                          | GTA CGA GGT CAT GTC TGG TG                                 |
| ATEG_06280.1P3                          | CGA AGA GGG TGA AGA GCA TTG CCG CCA ATA CTC TGT CTT TC     |
| ATEG_06280.1P4                          | CAT CAG TGC CTC CTC TCA GAC AGT AGA CGT GCC AAA CTG TGA C  |
| ATEG_06280.1P5                          | CAG AGG GTA TCG GTC ATG TT                                 |
| ATEG_06280.1P6                          | GAG CGG TGT CCA TTG TTA CT                                 |
| ATEG_06281.1P1                          | AGC TCG TTT ACC CCT GTT GG                                 |
| ATEG_06281.1P2                          | CAG GCA TCA AAA GCC GAA GG                                 |
| ATEG_06281.1P3                          | CGA AGA GGG TGA AGA GCA TTG GTT GCA CAC GTC CTC TCT CA     |
| ATEG_06281.1P4                          | GCA TCA GTG CCT CCT CTC AGA CAG CTG GTG CTA GCT GGC TTC TT |
| ATEG_06281.1P5                          | GGC TCG CCA AGG AGT AAT CA                                 |
| ATEG_06281.1P6                          | ACT CTG TAC TCC GTC CCT CC                                 |
| ATEG_06282.1P1                          | TGC ACA CCA ACA CTC CTG TA                                 |
| ATEG_06282.1P2                          | ACG TAG GAC CAA CCC TGA TAG T                              |
| ATEG_06282.1P3                          | CGA AGA GGG TGA AGA GCA TTG GTG ACT GCG GAT GGA AGT GT     |
| ATEG_06282.1P4                          | GCA TCA GTG CCT CCT CTC AGA CAG GAA CCA AAC GCT GTC ACT GG |
| ATEG_06282.1P5                          | CAG CCA TAA ACT CCA CGA AGC                                |
| ATEG_06282.1P6                          | CTC ACA ATC ATC GGC TCC CC                                 |
| Internal primer used for diagnostic PCR |                                                            |
| AfpyrGR                                 | CGG GAG CAG CGT AGA TGC C                                  |

**Table S2.** *A. terreus* strains used in this study

| Fungal strain or Transformants     | Gene mutation(s) | Genotype                                                |
|------------------------------------|------------------|---------------------------------------------------------|
| <i>Aspergillus terreus</i> NIH2624 | -                | wildtype                                                |
| CW6061.1, CW6061.2, CW6061.3       | ATEG_06270.1Δ    | <i>nkuA:: hph; pyrG-</i> , ATEG_06270.1:: <i>AfpyrG</i> |
| CW6062.1, CW6062.2                 | ATEG_06271.1Δ    | <i>nkuA:: hph; pyrG-</i> , ATEG_06271.1:: <i>AfpyrG</i> |
| CW6063.1, CW6063.2                 | ATEG_06272.1Δ    | <i>nkuA:: hph; pyrG-</i> , ATEG_06272.1:: <i>AfpyrG</i> |
| CW6064.1, CW6064.2, CW6064.3       | ATEG_06273.1Δ    | <i>nkuA:: hph; pyrG-</i> , ATEG_06273.1:: <i>AfpyrG</i> |
| CW6065.1, CW6065.2, CW6065.3       | ATEG_06274.1Δ    | <i>nkuA:: hph; pyrG-</i> , ATEG_06274.1:: <i>AfpyrG</i> |
| CW6066.1, CW6066.2                 | ATEG_06275.1Δ    | <i>nkuA:: hph; pyrG-</i> , ATEG_06275.1:: <i>AfpyrG</i> |
| CW6067.1, CW6067.2, CW6067.3       | ATEG_06276.1Δ    | <i>nkuA:: hph; pyrG-</i> , ATEG_06276.1:: <i>AfpyrG</i> |
| CW6068.1, CW6068.2, CW6068.3       | ATEG_06277.1Δ    | <i>nkuA:: hph; pyrG-</i> , ATEG_06277.1:: <i>AfpyrG</i> |
| CW6069.1, CW6069.2, CW6069.3       | ATEG_06278.1Δ    | <i>nkuA:: hph; pyrG-</i> , ATEG_06278.1:: <i>AfpyrG</i> |
| CW6070.1, CW6070.2, CW6070.3       | ATEG_06279.1Δ    | <i>nkuA:: hph; pyrG-</i> , ATEG_06279.1:: <i>AfpyrG</i> |
| CW6071.1, CW6071.2, CW6071.3       | ATEG_06280.1Δ    | <i>nkuA:: hph; pyrG-</i> , ATEG_06280.1:: <i>AfpyrG</i> |
| CW6072.1, CW6072.2                 | ATEG_06281.1Δ    | <i>nkuA:: hph; pyrG-</i> , ATEG_06281.1:: <i>AfpyrG</i> |
| CW6073.1, CW6073.2, CW6073.3       | ATEG_06282.1Δ    | <i>nkuA:: hph; pyrG-</i> , ATEG_06282.1:: <i>AfpyrG</i> |

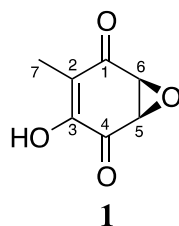

**Table S3.**  $^1\text{H}$  and  $^{13}\text{C}$  NMR data for compound **1**.  
(400 MHz and 100 MHz in acetone- $d_6$ )

| Position | $\delta$ H ( <i>J</i> in Hz) | $\delta$ C           |
|----------|------------------------------|----------------------|
| 1        |                              | 188.7, C             |
| 2        |                              | 119.9, C             |
| 3        |                              | 154.4, C             |
| 4        |                              | 192.2, C             |
| 5        | 3.97, d (4.0)                | 52.9, CH             |
| 6        | 3.87, d (4.0)                | 54.7, CH             |
| 7        | 1.83, s                      | 8.7, CH <sub>3</sub> |

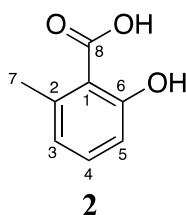

**Table S4.**  $^1\text{H}$  and  $^{13}\text{C}$  NMR data for compound **2**.  
(400 MHz and 100 MHz in acetone- $d_6$ )

| Position | $\delta$ H ( <i>J</i> in Hz) | $\delta$ C            |
|----------|------------------------------|-----------------------|
| 1        |                              | 113.2, C              |
| 2        |                              | 164.2, C              |
| 3        | 6.73, d (7.6)                | 116.1, CH             |
| 4        | 7.29, t (8.0)                | 135.0, CH             |
| 5        | 6.78, d (8.8)                | 123.5, CH             |
| 6        |                              | 142.6, C              |
| 7        | 2.56, s                      | 24.0, CH <sub>3</sub> |
| 8        |                              | 174.2, C              |
| 8-OH     | 11.2, br s                   |                       |

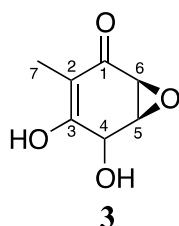

**Table S5.**  $^1\text{H}$  and  $^{13}\text{C}$  NMR data for compound **3**  
(400 MHz and 100 MHz in acetone- $d_6$ )

| Position | $\delta$ H ( <i>J</i> in Hz) | $\delta$ C           |
|----------|------------------------------|----------------------|
| 1        |                              | Not Identified       |
| 2        |                              | 108.9, C             |
| 3        |                              | 164.1, C             |
| 4        | 4.63, s                      | 66.0, CH             |
| 5        | 3.66, dd (3.2, 1.2)          | 52.3, CH             |
| 6        | 3.37, dd (3.6, 1.2)          | 55.3, CH             |
| 7        | 1.64, s                      | 7.5, CH <sub>3</sub> |

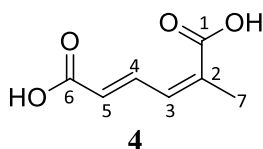

**Table S6.**  $^1\text{H}$  and  $^{13}\text{C}$  NMR data for compound **4**.  
(400 MHz and 100 MHz in acetone- $d_6$ )

| Position | $\delta$ H ( <i>J</i> in Hz) | $\delta$ C            | HMBC <sup>a</sup> | COSY     | NOESY                  |
|----------|------------------------------|-----------------------|-------------------|----------|------------------------|
| 1        |                              | 168.4, C              |                   |          |                        |
| 2        |                              | 136.1, C              |                   |          |                        |
| 3        | 6.67, d (12.0)               | 136.3, CH             | 1, 5, 7           | H-4, H-5 | H-4, H <sub>3</sub> -7 |
| 4        | 8.22, dd (15.2, 11.6)        | 141.5, CH             | 3, 5, 6           | H-3, H-5 | H-3, H-5               |
| 5        | 6.06, d (15.6)               | 126.6, CH             | 2, 3, 4, 6        | H-3, H-5 | H-4                    |
| 6        |                              | 168.0, C              |                   |          |                        |
| 7        | 2.10, s                      | 21.4, CH <sub>3</sub> | 1, 2, 3           |          | H-3                    |

<sup>a</sup>HMBC correlations are from proton(s) to the indicated carbon.



**Table S7.** AtX (ATEG\_06275.1) homologs with sequence identity over 40%.

| Seq ID                   | Species                                                    | Amino acids | Identity/Similarity (%) |
|--------------------------|------------------------------------------------------------|-------------|-------------------------|
| gb AAK48943.1 AF360398_1 | <i>Byssochlamys nivea</i>                                  | 1778        | 64/77                   |
| gb ADF47133.1            | <i>Penicillium griseofulvum</i>                            | 1774        | 63/75                   |
| ref XP_002564832.1       | <i>Penicillium chrysogenum</i><br><i>Wisconsin 54-1255</i> | 1776        | 63/75                   |
| gb EOD48890.1            | <i>Neofusicoccum parvum</i><br><i>UCRNP2</i>               | 1796        | 63/75                   |
| ref XP_001273093.1       | <i>Aspergillus clavatus</i><br><i>NRRL 1</i>               | 1720        | 64/76                   |
| emb CDM36380.1           | <i>Penicillium roqueforti</i>                              | 1776        | 62/76                   |
| gb EKG18983.1            | <i>Macrophomina</i><br><i>phaseolina MS6</i>               | 1754        | 63/75                   |
| gb AAC23536.1            | <i>Aspergillus parasiticus</i>                             | 1766        | 60/75                   |
| gb EIT77765.1            | <i>Aspergillus oryzae</i> 3.042                            | 1766        | 60/75                   |
| dbj BAE65442.1           | <i>Aspergillus oryzae</i> RIB40                            | 1766        | 60/74                   |
| gb EOD47055.1            | <i>Neofusicoccum parvum</i><br><i>UCRNP2</i>               | 1779        | 57/73                   |
| gb AFP89390.1            | <i>Cladosporium phlei</i>                                  | 1792        | 57/72                   |
| ref XP_002849666.1       | <i>Arthroderma otae</i> CBS<br>113480                      | 1773        | 56/72                   |
| gb ERF77015.1            | <i>Endocarpon pusillum</i><br><i>Z07020</i>                | 1801        | 56/71                   |
| ref XP_003015543.1       | <i>Arthroderma benhamiae</i><br>CBS 112371                 | 1776        | 55/71                   |
| ref XP_003169413.1       | <i>Arthroderma gypseum</i><br>CBS 118893                   | 1776        | 55/71                   |
| ref XP_003019112.1       | <i>Trichophyton verrucosum</i><br><i>HKI 0517</i>          | 1747        | 55/71                   |
| ref XP_003233709.1       | <i>Trichophyton rubrum</i> CBS<br>118892                   | 1774        | 55/71                   |
| gb EKG12695.1            | <i>Macrophomina</i><br><i>phaseolina MS6</i>               | 1738        | 55/71                   |
| gb AAX35547.1            | <i>Glarea lozoyensis</i>                                   | 1791        | 55/70                   |
| gb EYE91246.1            | <i>Aspergillus ruber</i> CBS<br>135680                     | 1782        | 55/70                   |
| gb ETS75984.1            | <i>Pestalotiopsis fici</i> W106-1                          | 1796        | 54/71                   |
| ref XP_001791162.1       | <i>Phaeosphaeria nodorum</i><br>SN15                       | 1720        | 54/71                   |
| gb EGX43547.1            | <i>Arthrotrichy oligospora</i><br>ATCC 24927               | 1761        | 53/69                   |
| gb AAS98200.1            | <i>Aspergillus ochraceus</i>                               | 1766        | 50/67                   |

|                    |                                                     |      |       |
|--------------------|-----------------------------------------------------|------|-------|
| ref XP_001826575.2 | <i>Aspergillus oryzae</i> RIB40                     | 1701 | 59/74 |
| ref XP_001402408.2 | <i>Aspergillus niger</i> CBS<br>513.88              | 1787 | 48/64 |
| gb EHA22196.1      | <i>Aspergillus niger</i> ATCC<br>1015               | 1779 | 48/64 |
| ref XP_002560460.1 | <i>Penicillium chrysogenum</i><br>Wisconsin 54-1255 | 1783 | 47/63 |
| gb AAB49684.1      | <i>Penicillium griseofulvum</i>                     | 1783 | 47/64 |
| gb EKV11531.1      | <i>Penicillium digitatum</i><br>PHI26               | 1785 | 47/63 |
| gb EGD94108.1      | <i>Trichophyton tonsurans</i><br>CBS 112818         | 1685 | 55/72 |
| gb EGE06642.1      | <i>Trichophyton equinum</i><br>CBS 127.97           | 1579 | 53/71 |
| gb AAR90279.1      | <i>Bipolaris maydis</i>                             | 1766 | 41/59 |
| ref WP_003879650.1 | <i>Mycobacterium fortuitum</i>                      | 1723 | 42/58 |
| ref YP_001071753.1 | <i>Mycobacterium</i> sp. JLS                        | 1704 | 43/57 |
| ref YP_640635.1    | <i>Mycobacterium</i> sp. MCS                        | 1704 | 42/57 |
| ref WP_003928522.1 | <i>Mycobacterium vaccae</i>                         | 1712 | 42/57 |
| emb CDO33136.1     | <i>Mycobacterium vulneris</i>                       | 1716 | 42/57 |
| ref YP_004522781.1 | <i>Mycobacterium</i> sp.<br>JDM601                  | 1718 | 42/58 |
| gb ACN64831.1      | <i>Streptomyces</i><br><i>diastatochromogenes</i>   | 1739 | 43/59 |
| ref WP_005628551.1 | <i>Mycobacterium</i><br><i>hassiacum</i>            | 1712 | 42/57 |
| ref YP_004076616.1 | <i>Mycobacterium gilvum</i><br>Spir1                | 1735 | 42/57 |
| ref YP_954639.1    | <i>Mycobacterium</i><br><i>vanbaalenii</i> PYR-1    | 1744 | 43/57 |
| ref YP_001133955.1 | <i>Mycobacterium gilvum</i><br>PYR-GCK              | 1698 | 42/57 |
| ref YP_008908204.1 | <i>Mycobacterium neoaurum</i><br>VKM Ac-1815D       | 1721 | 42/57 |
| ref YP_005002033.1 | <i>Mycobacterium rhodesiae</i><br>NBB3              | 1725 | 41/57 |
| ref WP_003926867.1 | <i>Mycobacterium</i><br><i>thermoresistibile</i>    | 1758 | 41/56 |
| ref WP_003086619.1 | <i>Amycolatopsis</i><br><i>vancoresmycina</i>       | 1742 | 42/57 |
| gb AAZ77673.1      | <i>Streptomyces antibioticus</i>                    | 1756 | 41/56 |

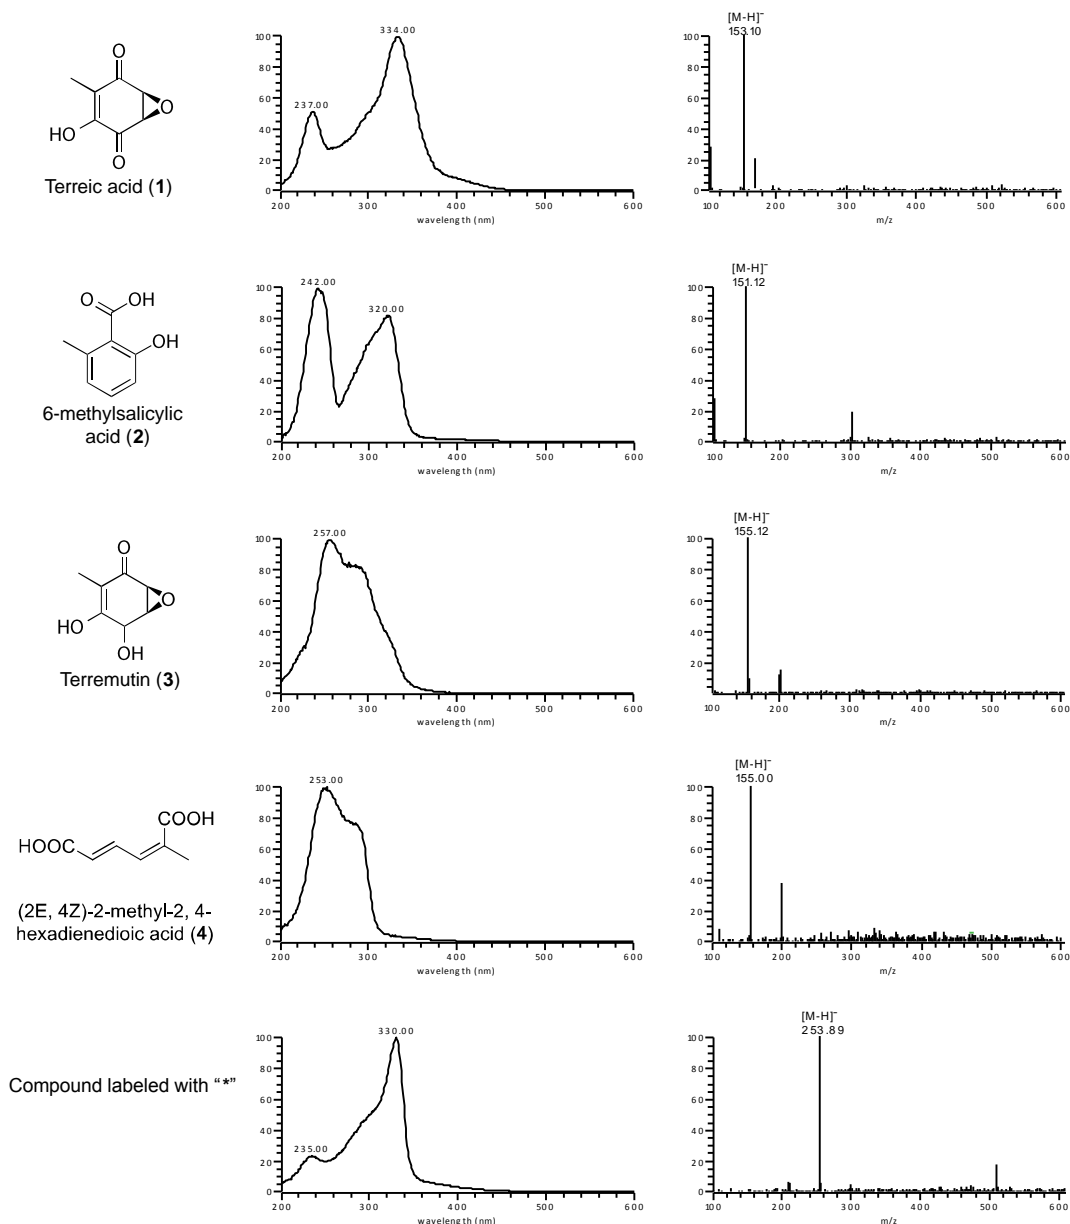

**Figure S1.** UV-Vis and ESIMS spectra of compounds **1** to **4** and unrelated compound (\*). The molecular formula of the compound labeled with “\*” was determined by HRESIMS to be  $C_{12}H_{16}NO_5$   $[M - H]^-$  ( $m/z$  254.1035, calcd for  $C_{12}H_{16}NO_5$  254.1034). The compound labeled with “\*” is not terreic acid (**1**) pathway related based on two evidence: (1). It can be detected in the *atX* $\Delta$  strain; (2). The HRESIMS predicted molecular formula suggests that the compound contains one nitrogen, but there is no nitrogen-bearing group identified in terreic acid (**1**) or any of the proposed intermediates in its pathway.

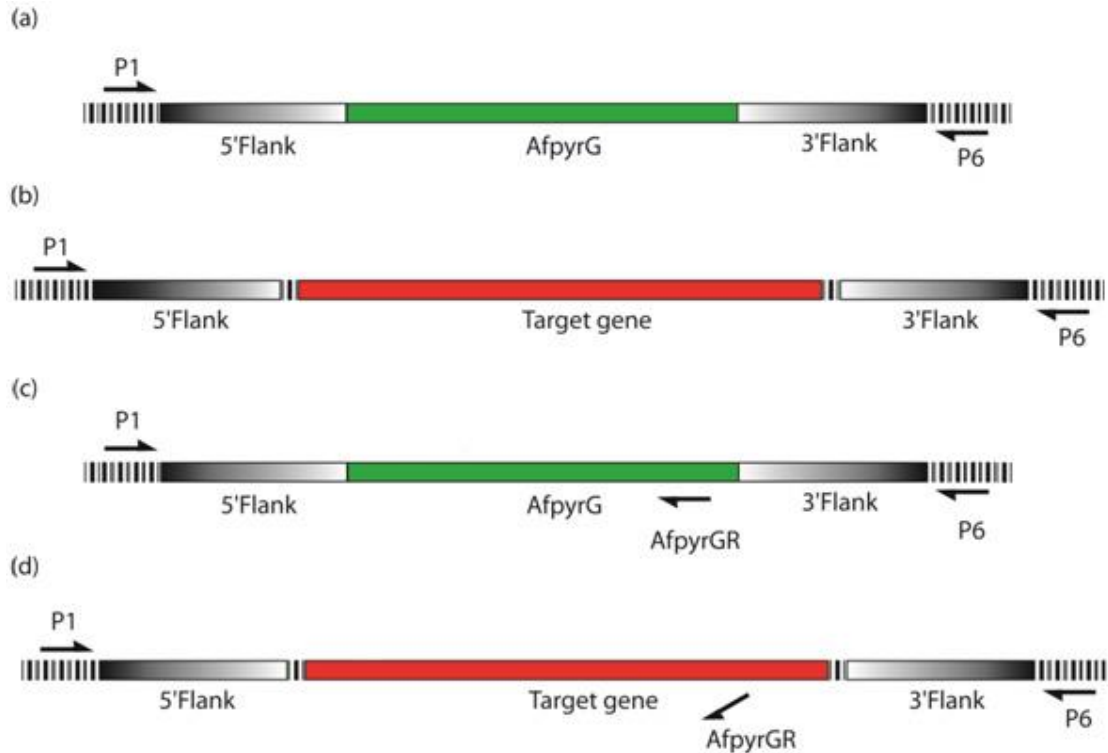

**Figure S2.** Schematic of the diagnostic PCR strategy.

We used two redundant strategies to determine if the target gene had been deleted by replacement with *AfpyrG*. In one strategy, DNA from transformants is amplified with two primers, P1 from the chromosomal region just outside of the 5' flank of the transforming DNA fragment and P6 from just outside of the 3' flank. If the target gene is different in size from the *AfpyrG* gene, which was used as a selectable marker for transformation, the PCR fragment amplified from a correct transformant (a) will be different in size from the fragment amplified if the target gene is intact (b). In some instances the target gene and the *AfpyrG* cassette will be of comparable size and a second strategy is applied. In the second strategy, P1 or P6 are used with internal primers specific to the *AfpyrG* cassette. For example, if the target gene has been replaced by the *AfpyrG* gene (c), P1 and *AfpyrGR* will amplify a fragment of a predictable size. If the target gene has not been replaced (d), the *AfpyrGR* primer will not anneal and there will be no specific amplification.

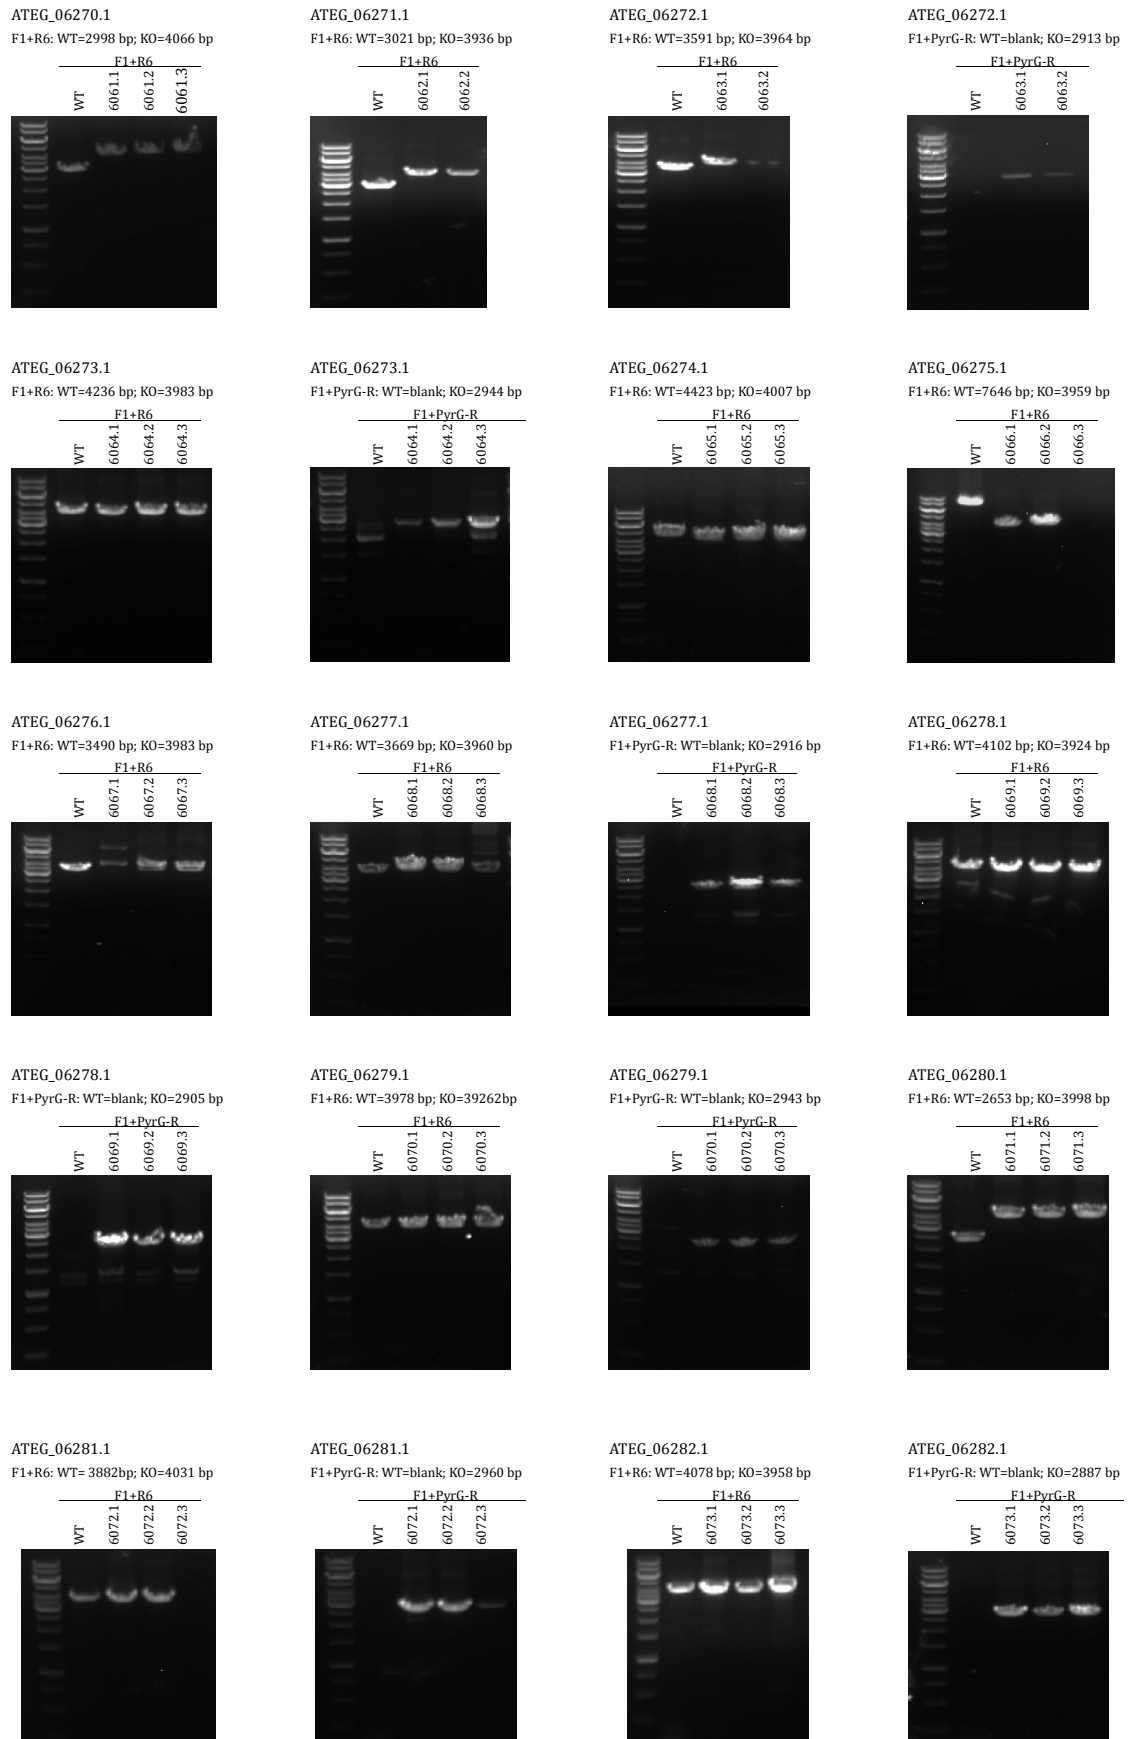

**Figure S3.** Results of diagnostic PCR for all the gene deletion strains.

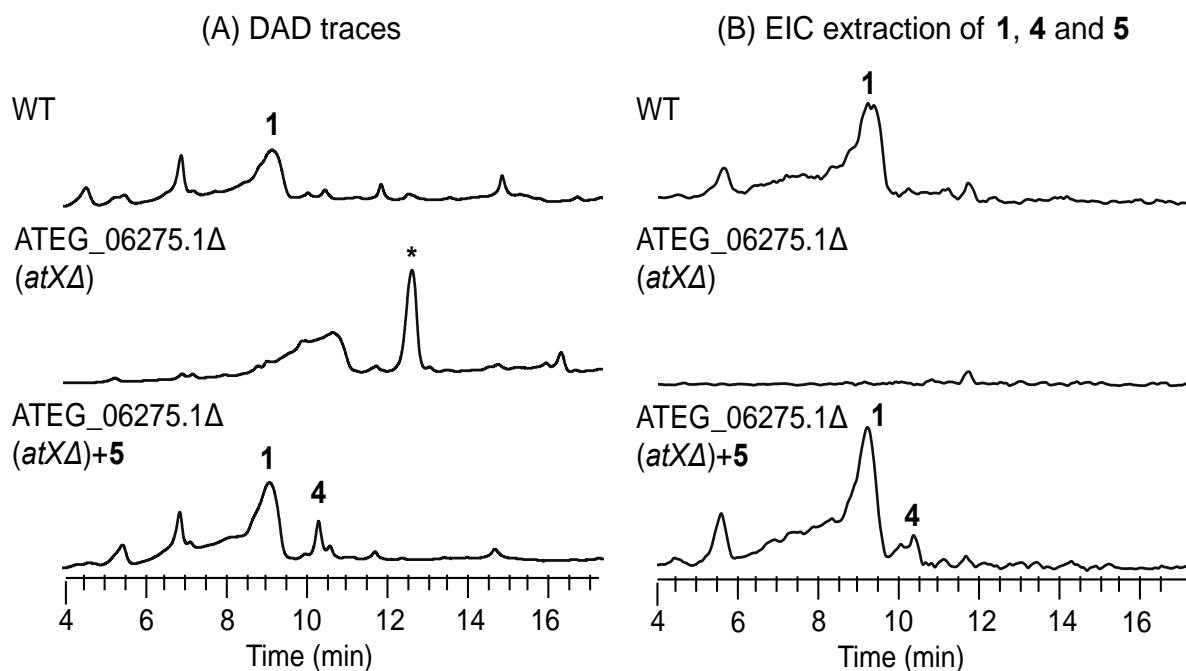

**Figure S4.** (A) The DAD traces of extracts from the wildtype, *atXΔ* and *atXΔ* fed with 3-methylcatechol (**5**) as detected by UV (200-600 nm). The peak labeled with “\*” corresponds to the compound labeled with “\*” in Figure 2. (B) EIC extraction of **1**, **4** and **5** ( $m/z=153, 155$  and  $123 [M-H]^-$ ) from the negative ESI-MS trace in the profiles of the wildtype, *atXΔ* and *atXΔ* fed with 3-methylcatechol (**5**). Feeding the *atXΔ* mutant with 0.2 mg/ml 3-methylcatechol (**5**) recovers TA (**1**) production and accumulates **4**. This suggests that 3-methylcatechol (**5**) is an intermediate of TA (**1**) and compound **5** could be degraded to **4**. The retention time of 3-methylcatechol (**5**) is 12.83 min, but it was not detected probably due to complete decomposition.

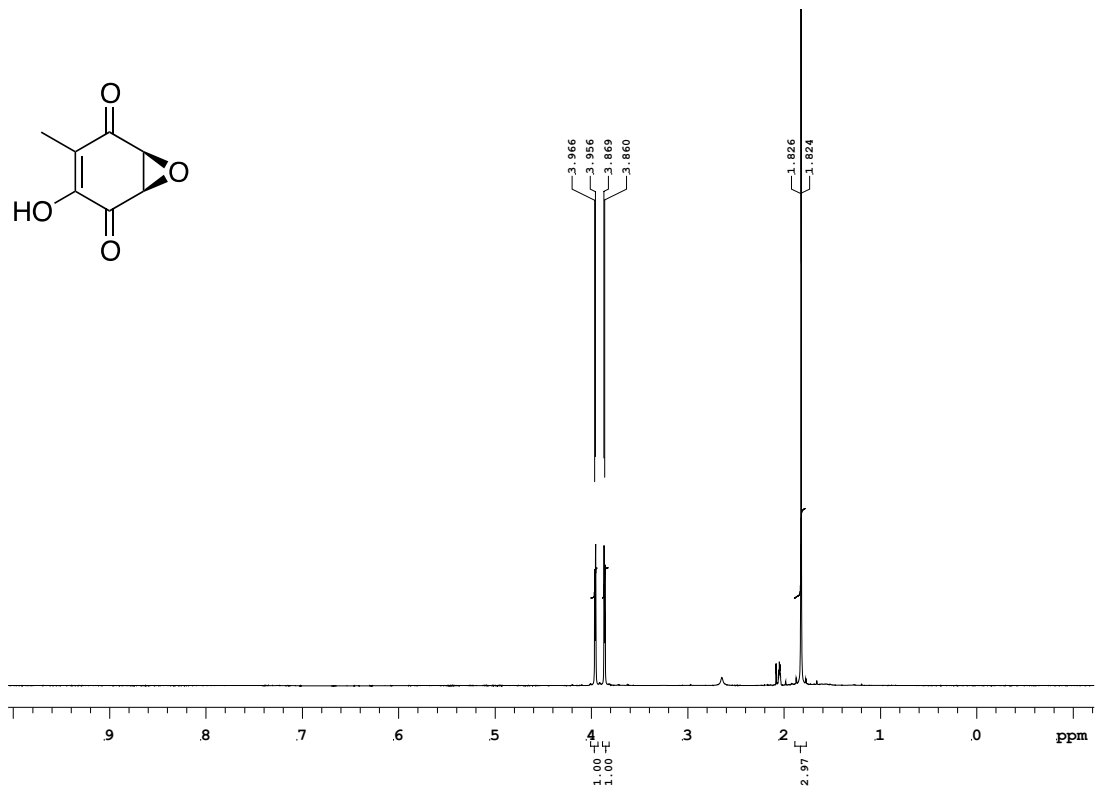

a.  $^1\text{H}$  NMR spectrum of TA 1, acetone- $d_6$ : 2.05 (m) ppm

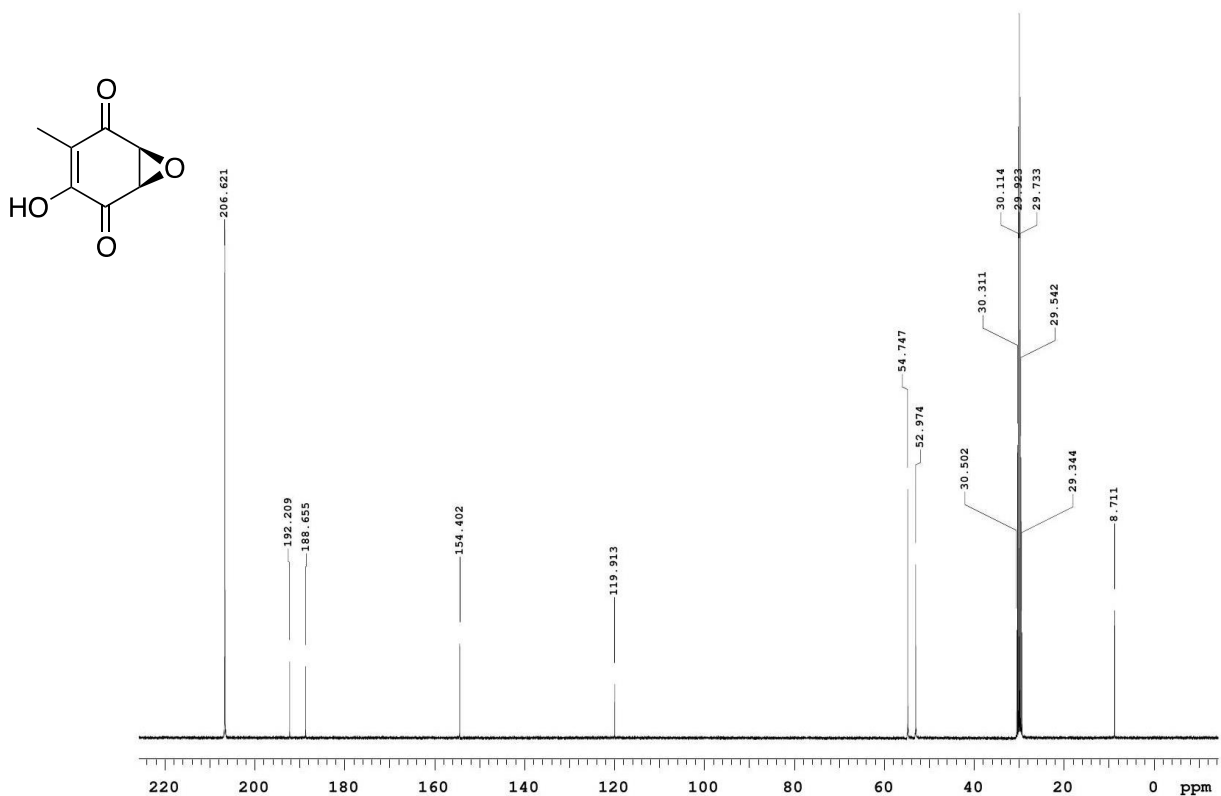

b.  $^{13}\text{C}$  NMR spectrum of TA 1, acetone- $d_6$ : 206.6 (s), 29.92 (m) ppm

**Figure S5.**  $^1\text{H}$  NMR and  $^{13}\text{C}$  NMR spectrum of TA 1.

20131125\_6272\_HCL\_YAG\_cpd4

Sample Name:  
20131125\_6272\_HCL\_YAG\_cpd4  
Data Collected on:  
Agilent-NMR-mercury400  
Archive directory:  
/home/wang/vnmrsys/data  
Sample directory:  
20131125\_6272\_HCL\_YAG\_cpd4\_20131125\_01  
FidFile: PROTON\_02

Pulse Sequence: PROTON (s2pul)  
Solvent: acetone  
Data collected on: Nov 25 2013

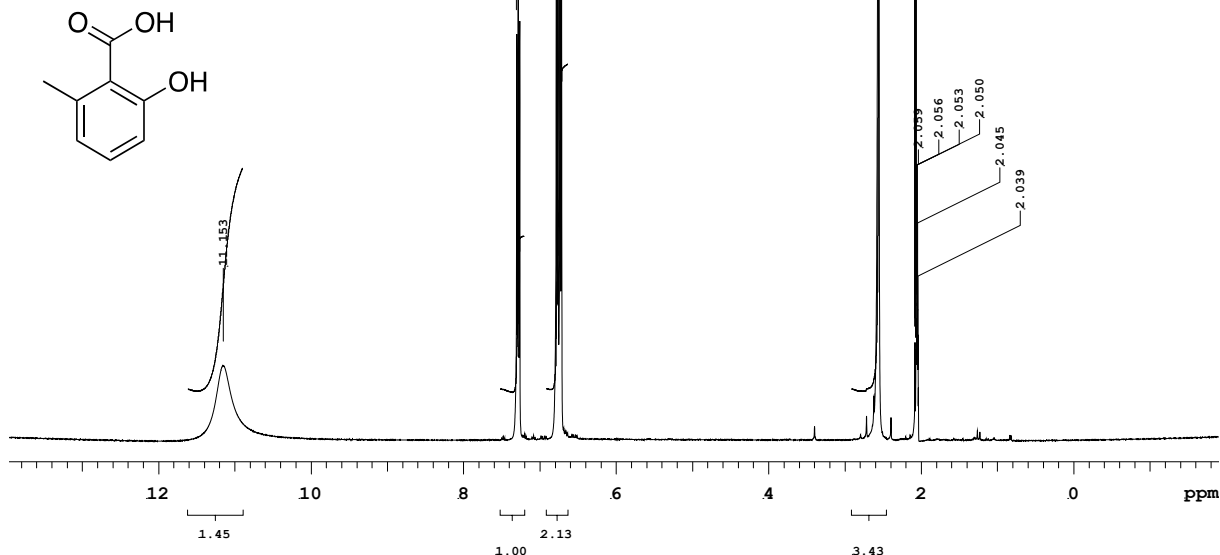

a.  $^1\text{H}$  NMR spectrum of compound **2**, acetone- $d_6$ : 2.05 (m) ppm

20131125\_6272\_HCL\_YAG\_cpd4

Sample Name:  
20131125\_6272\_HCL\_YAG\_cpd4  
Data Collected on:  
Agilent-NMR-mercury400  
Archive directory:  
/home/wang/vnmrsys/data  
Sample directory:  
20131125\_6272\_HCL\_YAG\_cpd4\_20131125\_01  
FidFile: CARBON\_01

Pulse Sequence: CARBON (s2pul)  
Solvent: acetone  
Data collected on: Nov 25 2013

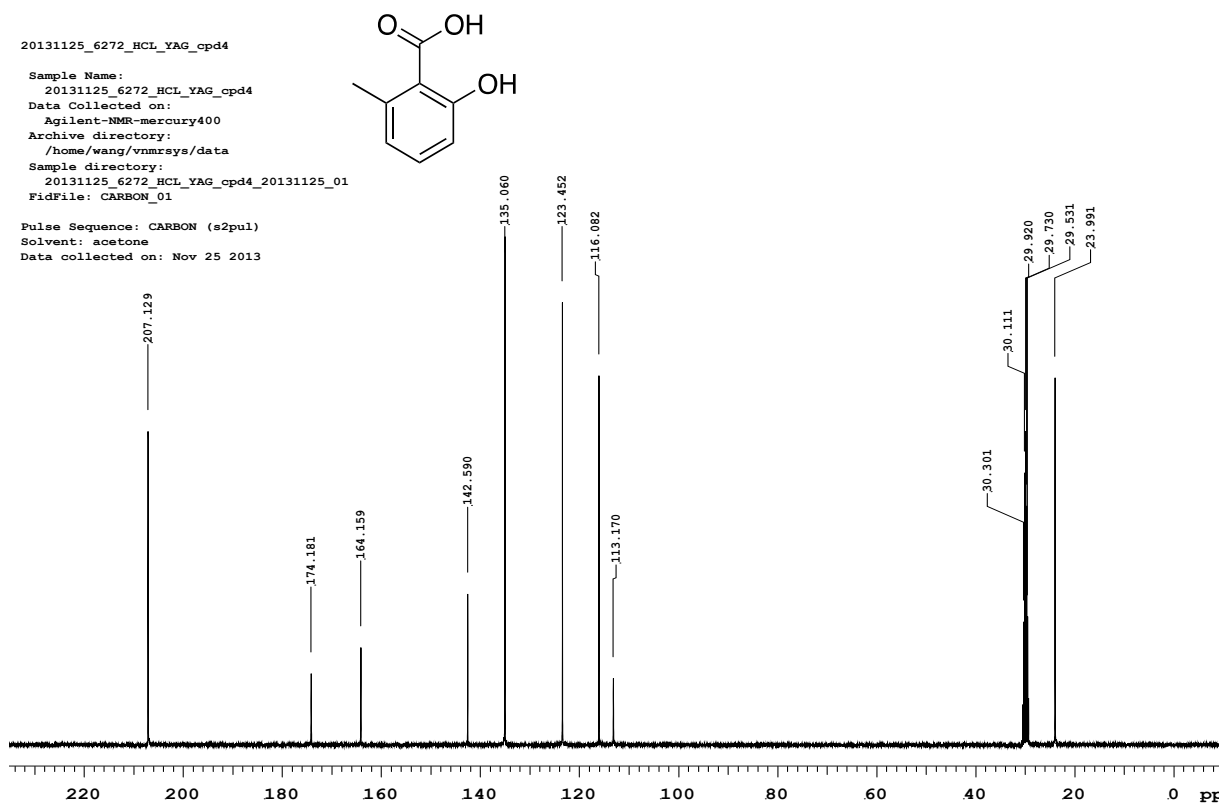

b.  $^{13}\text{C}$  NMR spectrum of compound **2**, acetone- $d_6$ : 207.1 (s), 29.92 (m) ppm

**Figure S6.**  $^1\text{H}$  NMR and  $^{13}\text{C}$  NMR spectrum of compound **2**.



6274-Cpd5\_170mg

Sample Name:  
6274-Cpd5\_170mg  
Data Collected on:  
Agilent-NMR-mercury400  
Archive directory:  
/home/wang/vnmrsys/data  
Sample directory:  
6274-Cpd5\_170mg\_20140125\_01  
FidFile: PROTON\_01

Pulse Sequence: PROTON (s2pul)  
Solvent: acetone  
Data collected on: Jan 25 2014

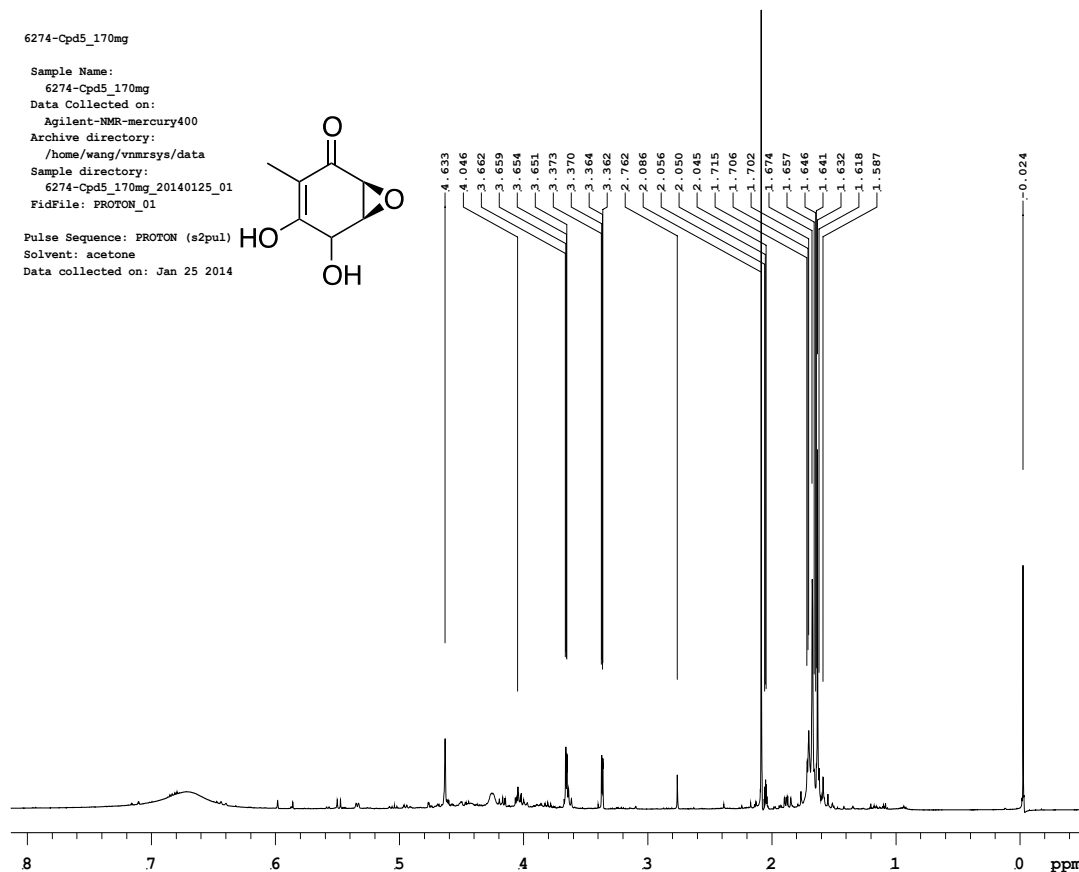

a.  $^1\text{H}$  NMR spectrum of compound 3, acetone- $d_6$ : 2.05 (m) ppm

6274-Cpd5\_170mg

Sample Name:  
6274-Cpd5\_170mg  
Data Collected on:  
Agilent-NMR-mercury400  
Archive directory:  
/home/wang/vnmrsys/data  
Sample directory:  
6274-Cpd5\_170mg\_20140125\_01  
FidFile: CARBON\_02

Pulse Sequence: CARBON (s2pul)  
Solvent: acetone  
Data collected on: Jan 25 2014

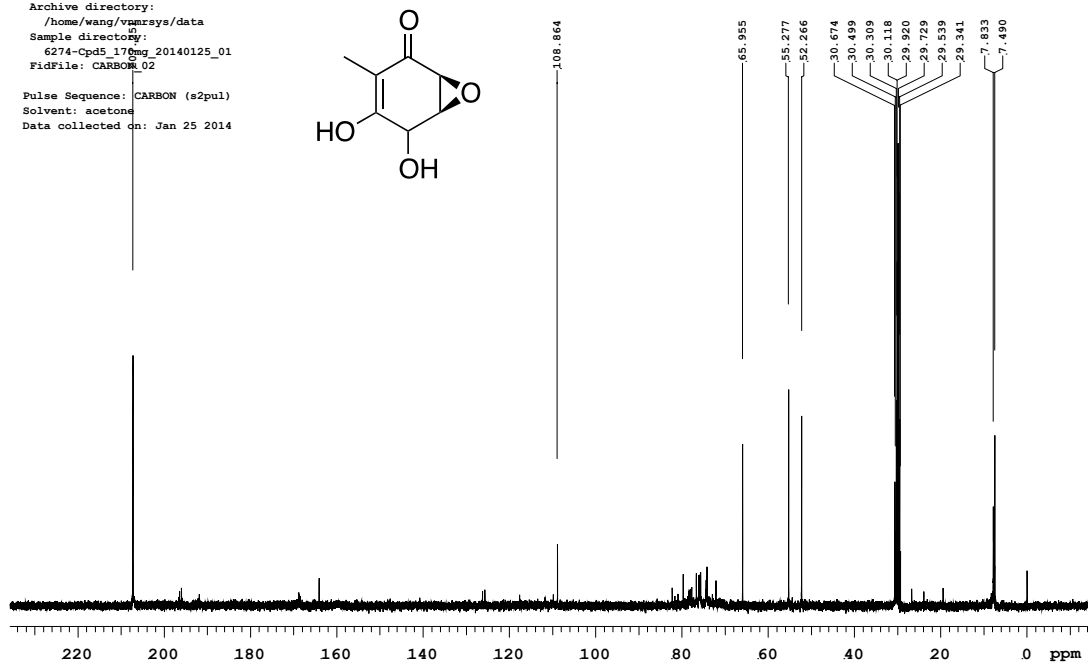

b.  $^{13}\text{C}$  NMR spectrum of compound 3, acetone- $d_6$ : 207.2 (s), 29.92 (m) ppm

**Figure S7.**  $^1\text{H}$  NMR and  $^{13}\text{C}$  NMR spectrum of compound 3.

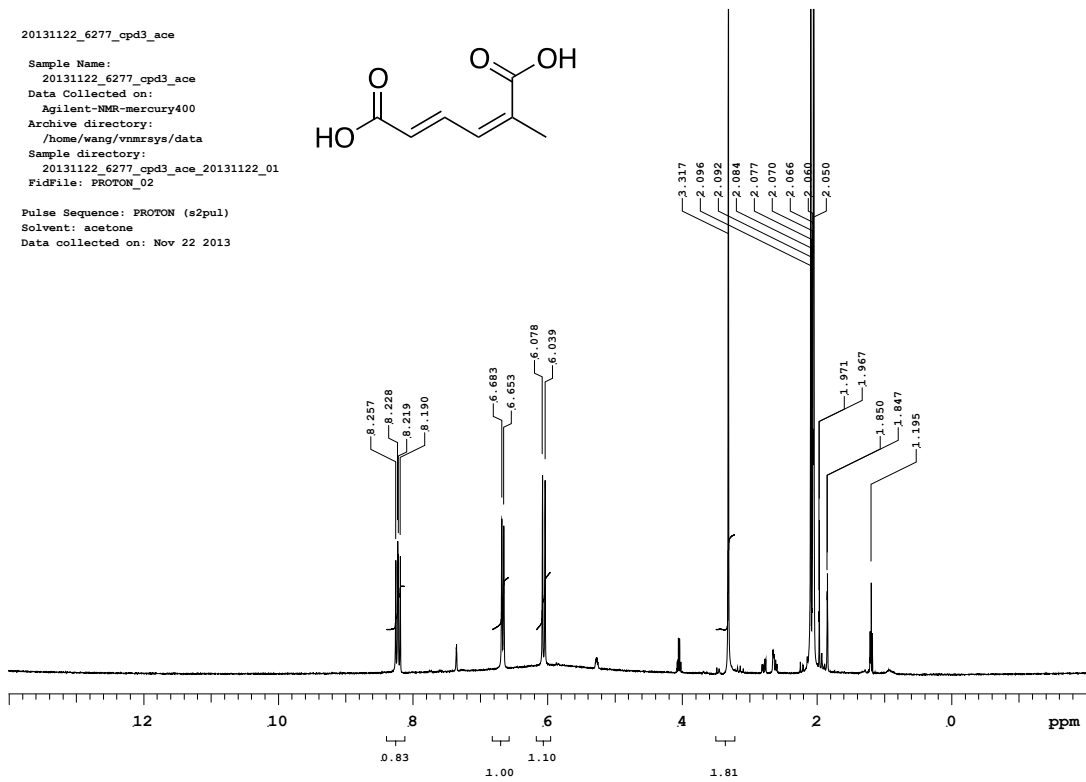

a.  $^1\text{H}$  NMR spectrum of compound 4, acetone- $d_6$ : 2.05 (m) ppm

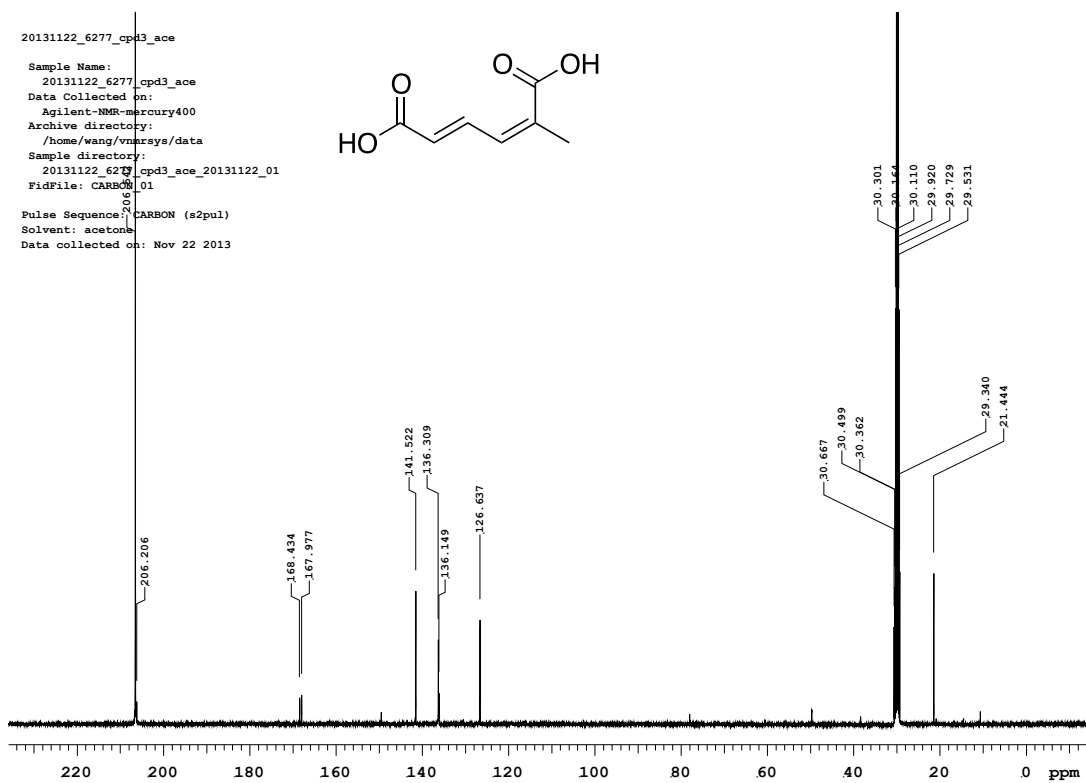

b.  $^{13}\text{C}$  NMR spectrum of compound 4, acetone- $d_6$ : 207.1 (s), 29.92 (m) ppm

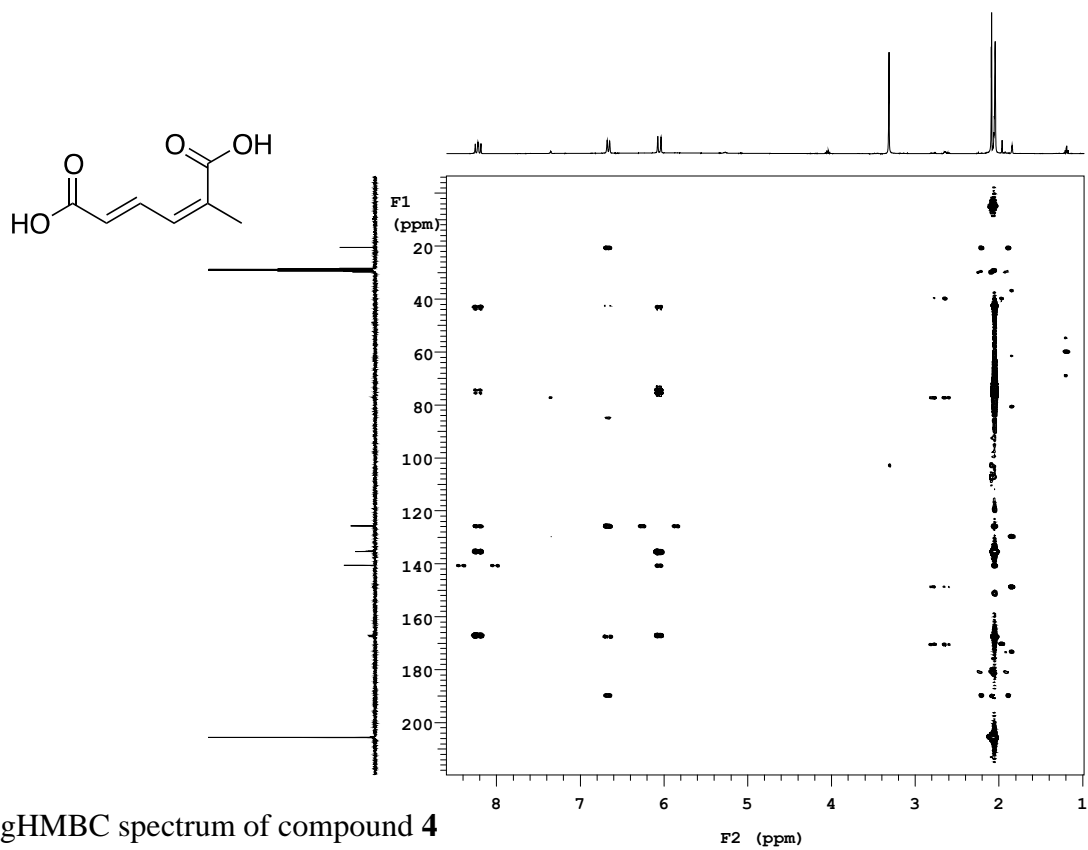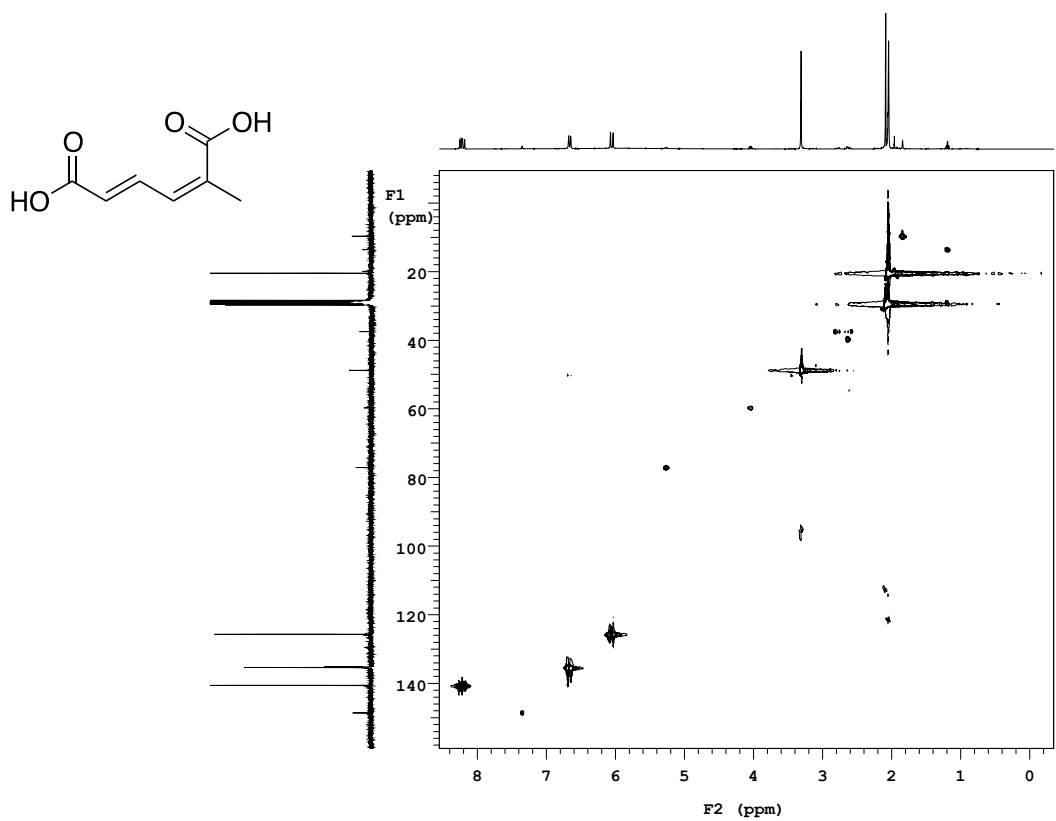

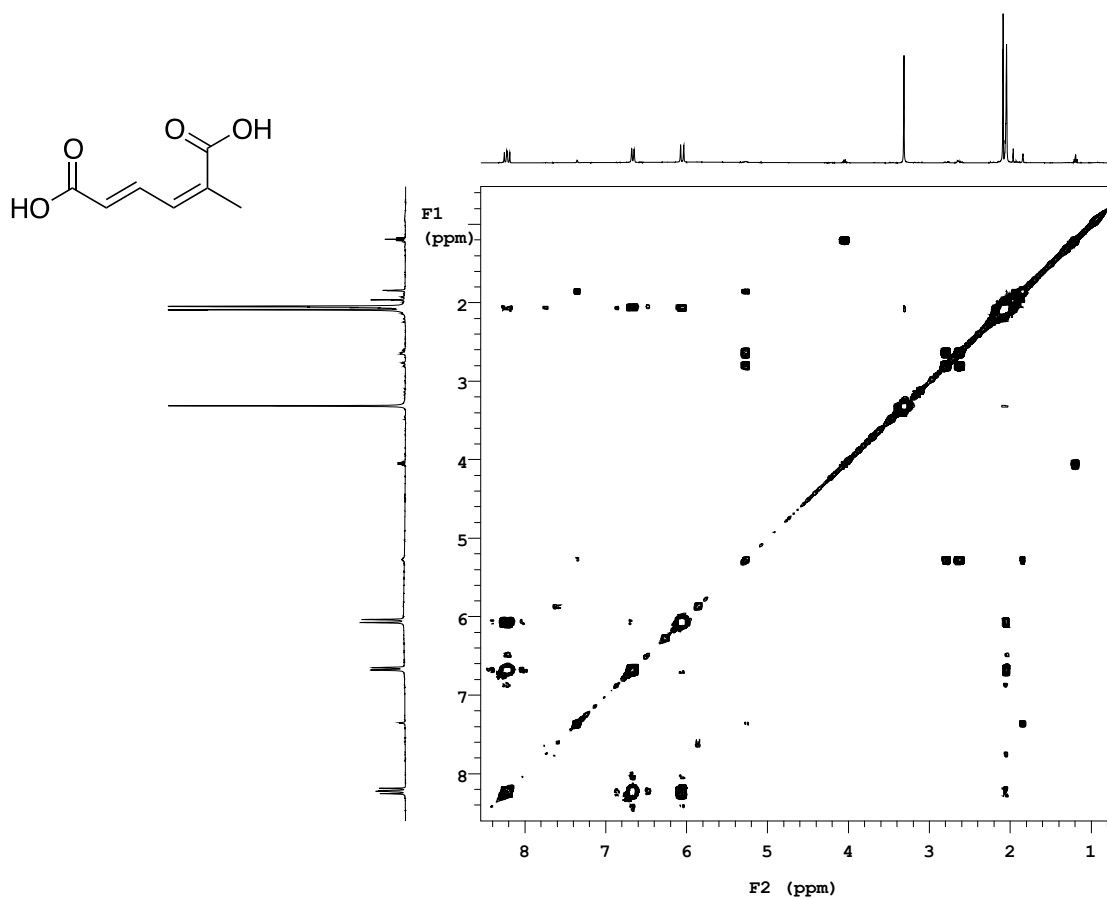

e. gCOSY spectrum of compound 4

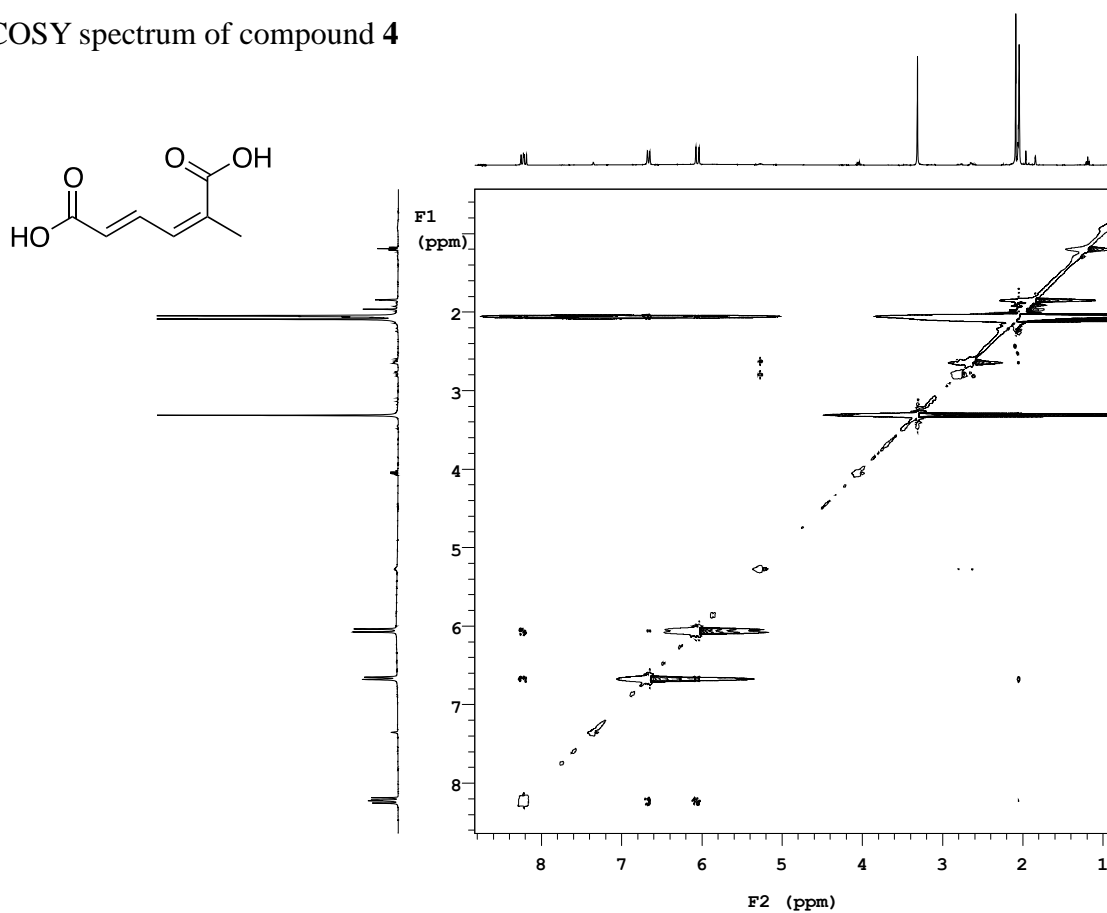

f. NOESY spectrum of compound 4

**Figure S8.** <sup>1</sup>H NMR, <sup>13</sup>C NMR, gHMBC, gHMQC, gCOSY and NOESY spectrum of compound 4.
